# Supplementary material for: Characterisation of nonlinear receptive fields of visual neurons by convolutional neural network
Source: PubMed Central journal article supplement (PMC6405885; doi:10.1038/s41598-019-40535-4), 2019-03-07
Supplement: 41598_2019_40535_MOESM1_ESM.pdf [file 41598_2019_40535_MOESM1_ESM.pdf]

**Supplementary Information of “Characterisation of nonlinear receptive fields of visual neurons by convolutional neural network”**

**Jumpei Ukita, Takashi Yoshida, and Kenichi Ohki**

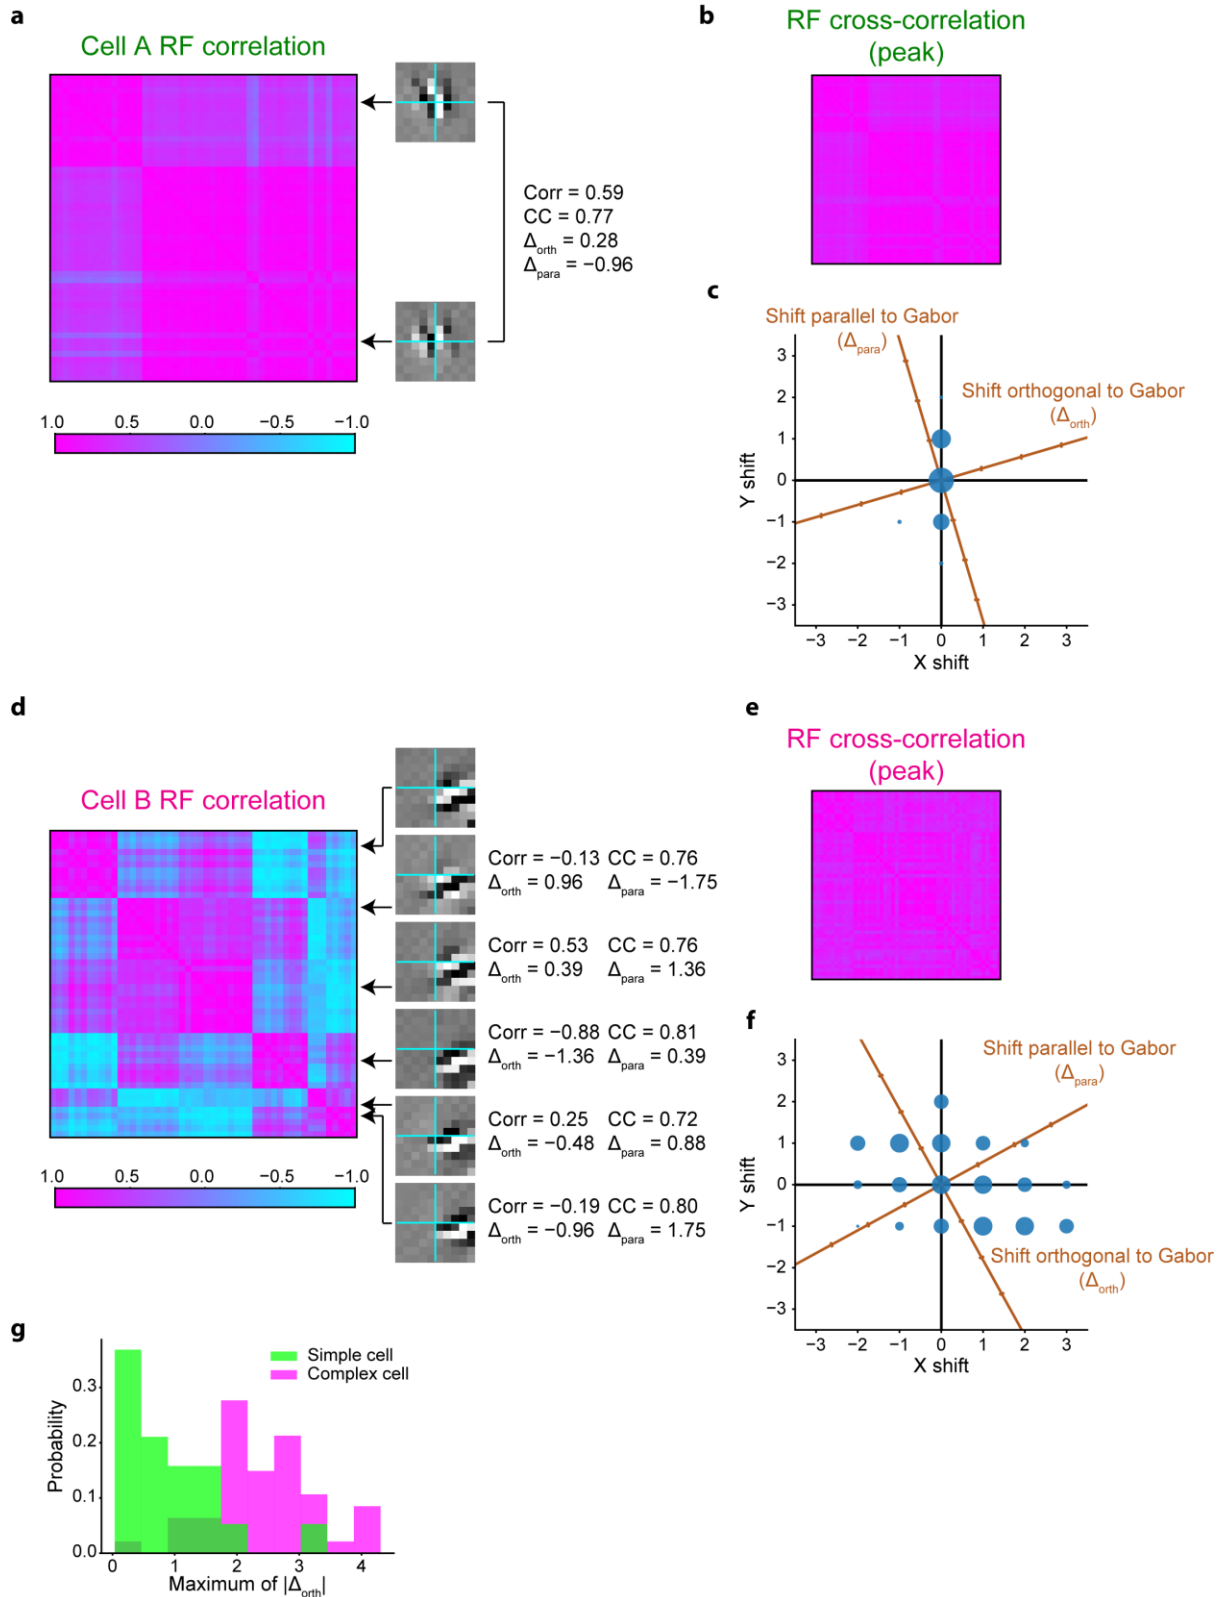

**Fig S1. Summary of the estimated RFs for the simulated simple cells and complex cells.**

(a, d) Left: correlation matrix of the iteratively visualised RF images of representative simulated simple

cell A **(a)** and complex cell B **(d)**. Each row and column correspond to one of the 100 RF images, sorted so that clusters can be clearly visualised. Right: representative RF images. Their correlation, cross-correlation, shift orthogonal to the Gabor orientation, and shift parallel to the Gabor orientation are also shown. For cell B, these metrics were calculated with reference to the top RF image. **(b, e)** Peak cross-correlation matrix of the RF images of each cell. The ordering of RF images and the colour bar are the same as **(a)** or **(e)**. **(c, f)** Scatter plot showing the distances with which each pair of RF images were shifted. The size of each scatter corresponds to the probability. The x- and y-axis correspond to the vertical and horizontal axis of the images, respectively. **(g)** Population distribution of the maximum shift distance orthogonal to the Gabor orientation.

**a**

CNN RF of simulated simple cell A (white noise)

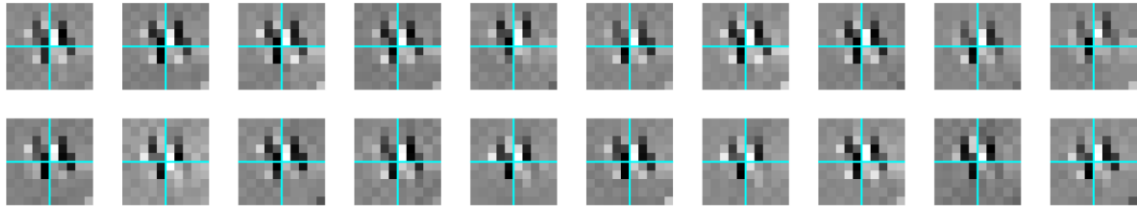

**b**

CNN RF of simulated complex cell B (white noise)

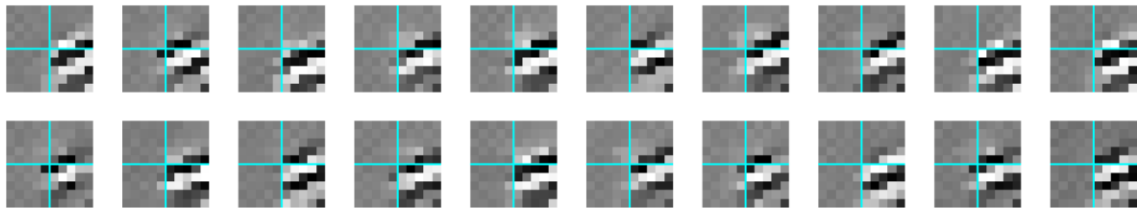

**Fig S2. RFs estimated using white noise as the stimuli.**

Results of iterative CNN RF estimations for representative cell A (**a**) and cell B (**b**) using a simulated dataset that consists of the white noise images and the corresponding responses. Only 20 out of the 100 generated RF images are shown in this figure.

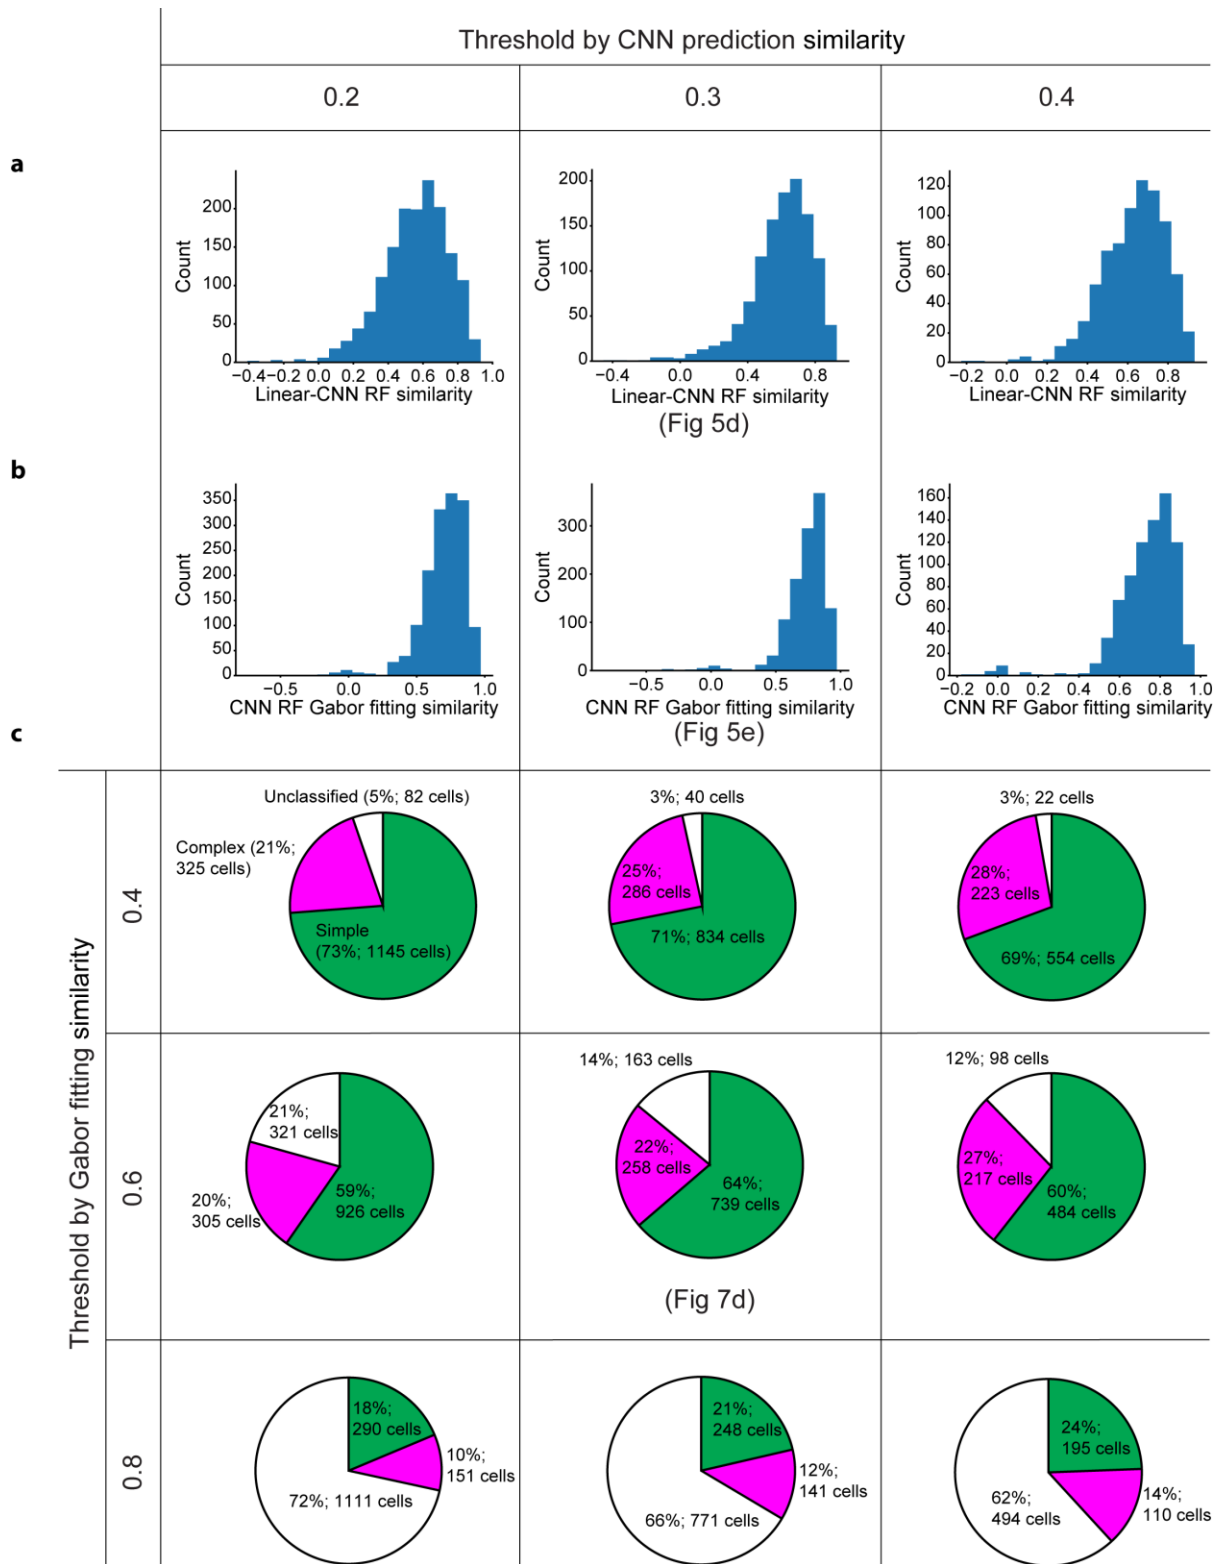

**Fig S3. On the dependence of the results on the choice of the thresholds.**

(a, b) Similarity between linear RFs and CNN RFs (a) and Gabor fitting similarity of CNN RFs (b) were

computed using different thresholds for the cell selection. Left: neurons with a CNN prediction similarity  $> 0.2$  were analysed. Middle: neurons with a CNN prediction similarity  $> 0.3$  were analysed. Right: neurons with a CNN prediction similarity  $> 0.4$  were analysed. (c) The proportion of classified cells, simple cells, and complex-like cells calculated with different thresholds for the cell selection.

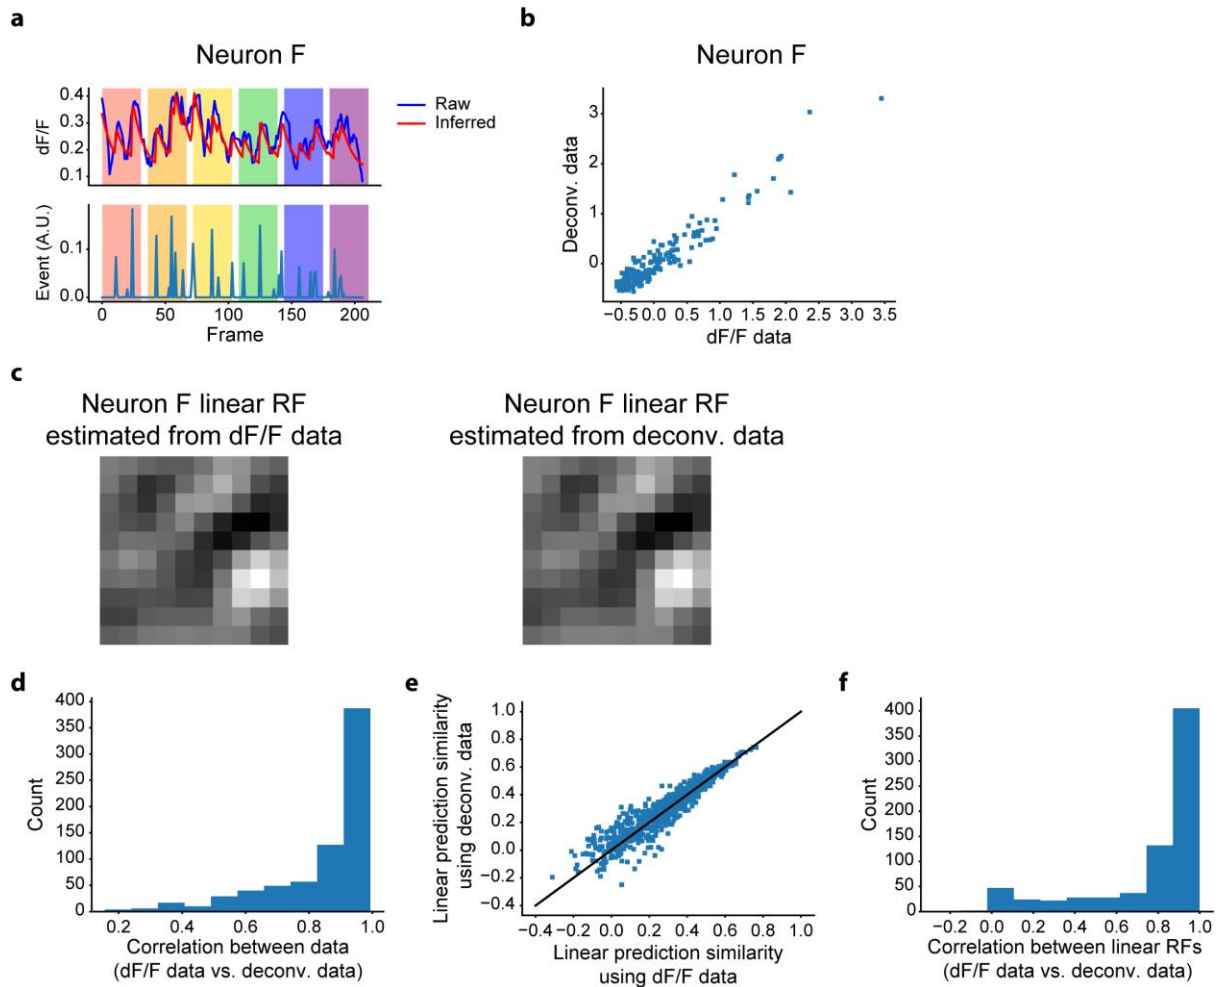

**Fig S4. Comparison of linear models using deconvolved data and dF/F data.**

**(a)** Representative calcium trace (top blue), estimated spike events (bottom), and the trace inferred from the estimated events (top red). Different shade colour indicates a different stimulus presented to the animal. **(b)** Relationship of the responses between the dF/F data and deconvolved data for the representative neuron F. **(c)** Linearly estimated RFs using dF/F data (left) and deconvolved data (right) of the representative neuron F. **(d)** Population distribution of the correlation between the dF/F data and the deconvolved data. **(e)** Population scatter plot of the linear prediction similarities using each data. **(f)** Population distribution of the correlation between the linear RFs estimated using each data.

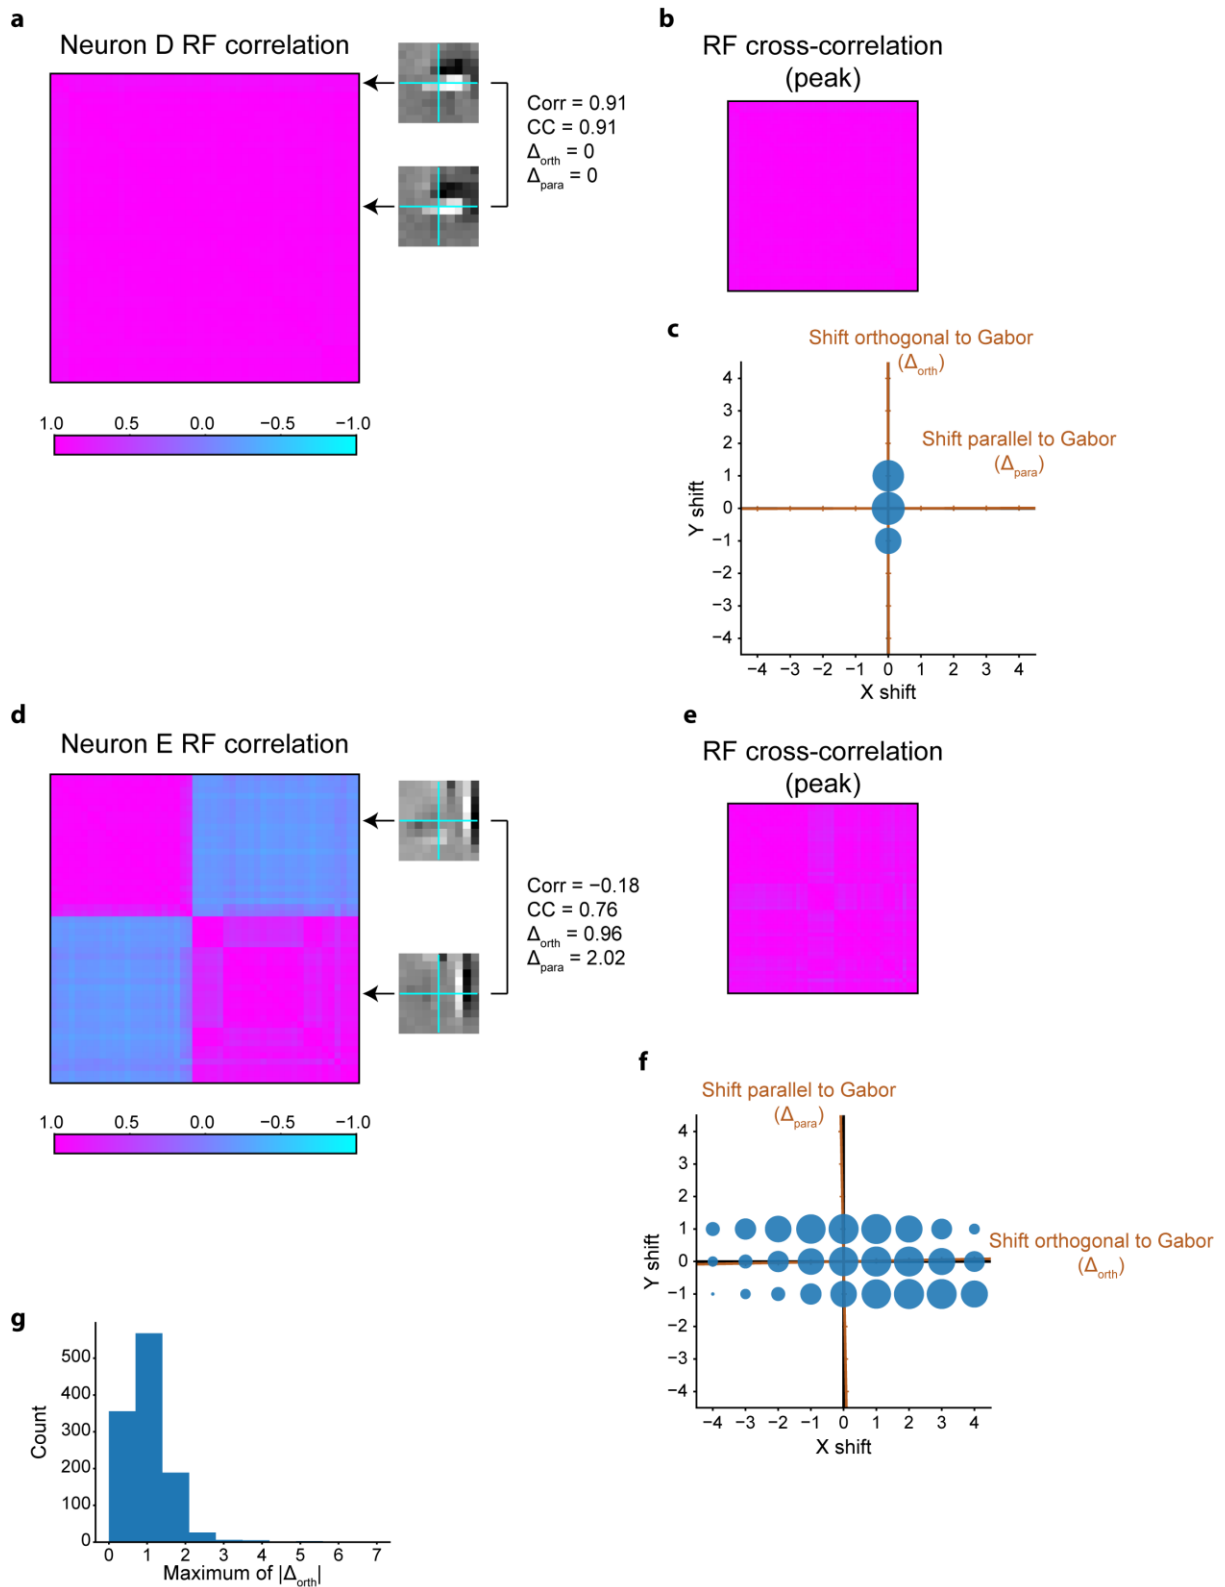

**Fig S5. Summary of the estimated RFs for the V1 neurons.**

(a, d) Left: correlation matrix of the iteratively visualised RF images of representative neuron D (a) and E



(**d**). Each row and column correspond to one of the 100 RF images, sorted so that clusters can be clearly visualised. Right: representative RF images. Their correlation, cross-correlation, shift orthogonal to the Gabor orientation, and shift parallel to the Gabor orientation are also shown. (**b, e**) Peak cross-correlation matrix of the RF images of each neuron. The ordering of RF images and the colour bar are the same as (**a**) or (**e**). (**c, f**) Scatter plot showing the distances with which each pair of RF images were shifted. The size of each scatter corresponds to the probability. The x- and y-axis correspond to the vertical and horizontal axis of the images, respectively. (**g**) Distribution of the maximum shift distance orthogonal to the Gabor orientation.
